# Supplementary material for: Hippocampal neurons require a large pool of glutathione to sustain dendrite integrity and cognitive function
Source: PubMed Central journal article supplement — Redox Biol. 2018 Aug 7;19:52–61. doi: 10.1016/j.redox.2018.08.003 (PMC6092450; doi:10.1016/j.redox.2018.08.003), 2018-08-07
Supplement: mmc1.pdf [file mmc1.pdf]

## SUPPLEMENTARY FIGURES

### **Hippocampal neurons require a large pool of glutathione to sustain dendrite integrity and cognitive function**

Seila Fernandez-Fernandez<sup>1</sup>, Veronica Bobo-Jimenez<sup>1,2</sup>, Raquel Requejo-Aguilar<sup>1,3</sup>, Silvia Gonzalez-Fernandez<sup>1</sup>, Monica Resch<sup>1</sup>, Monica Carabias-Carrasco<sup>1</sup>, Joaquim Ros<sup>4</sup>, Angeles Almeida<sup>1,2</sup> and Juan P. Bolaños<sup>1,2,5\*</sup>

<sup>1</sup>Institute of Functional Biology and Genomics (IBFG), Universidad de Salamanca, Spain;

<sup>2</sup>Institute of Biomedical Research of Salamanca (IBSAL), Hospital Universitario de Salamanca, Spain;

<sup>3</sup>Córdoba Maimónides Institute for Biomedical Research (IMIBIC), University of Cordoba, Spain;

<sup>4</sup>Departamento de Ciències Mèdiques Bàsiques, IRBLleida, Universitat de Lleida, Spain;

<sup>5</sup>CIBERFES, Instituto de Salud Carlos, III, Madrid, Spain;

**\*Corresponding author:**

Juan P. Bolaños

Institute of Functional Biology and Genomics (IBFG), University of Salamanca-CSIC,  
C/ Zacarías González, 2, 37007 Salamanca, Spain

Tel: +34-923294907; Fax: +34-923224876

[jbolanos@usal.es](mailto:jbolanos@usal.es)

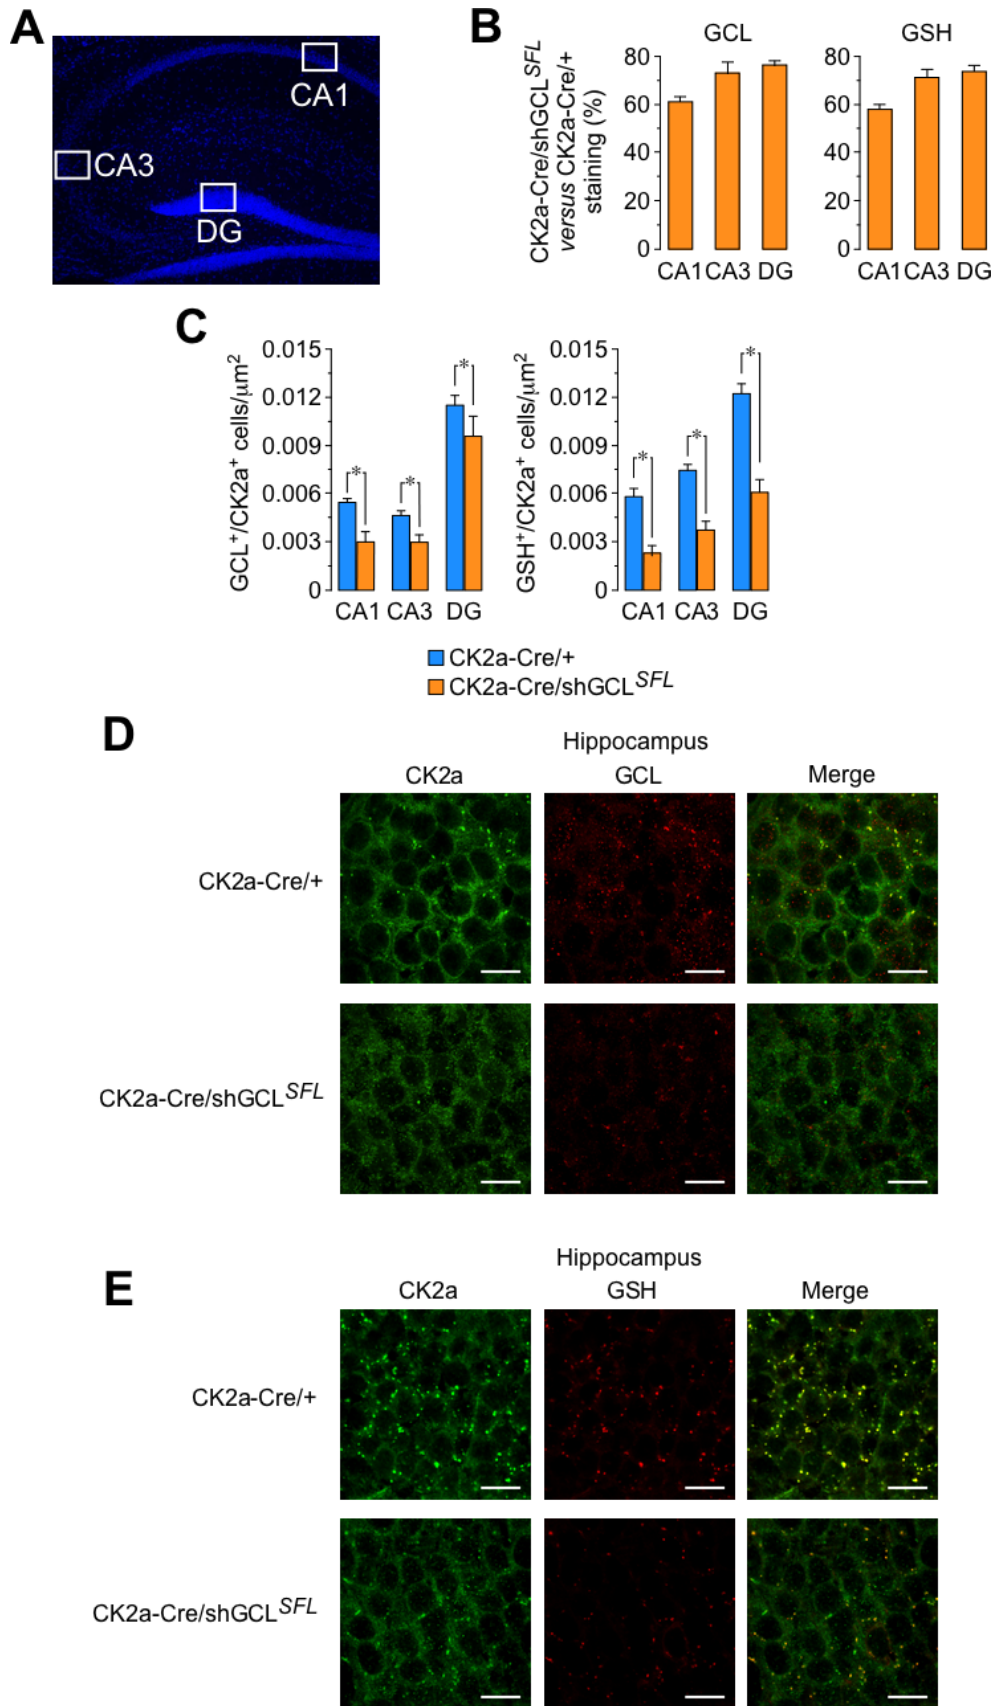

**Supplementary Figure S1** GCL and GSH staining data in the hippocampus of the CK2a-Cre/shGCL<sup>SFL</sup> mice *in vivo*. (A) Immunofluorescence DAPI signal showing the selected

hippocampal areas analyzed (CA1, CA3 DG). **(B)** GCL and GSH relative abundances expressed as the ratio CK2a-Cre/shGCL<sup>SFL</sup> versus littermate controls (CK2a-Cre/+). **(C)** Number of GCL<sup>+</sup>/CK2a<sup>+</sup> and GSH<sup>+</sup>/CK2a<sup>+</sup> cells in CK2a-Cre/shGCL<sup>SFL</sup> and CK2a-Cre/+ mice. Data are mean  $\pm$  SEM values (n=4). \*p<0.05 (Student's *t* test). **(D,E)** Representative images for GCL **(D)** and GSH **(E)** immunostaining in the hippocampus of the 9 months-old CK2a-Cre/shGCLSFL male mice and their littermates controls (CK2a-Cre/+). Scale bars, 50  $\mu$ m.

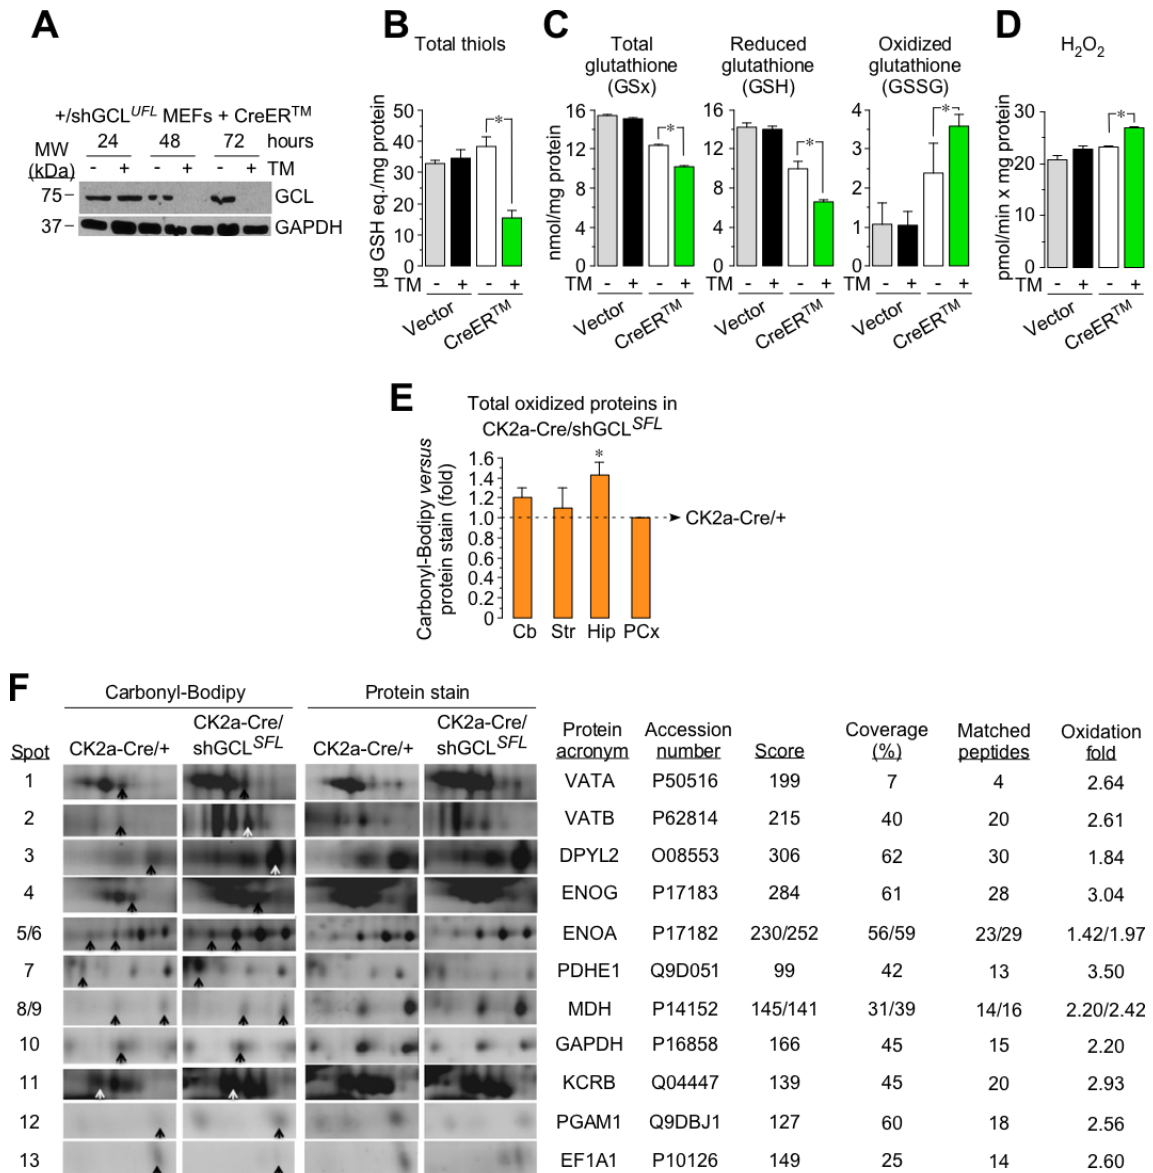

**Supplementary Figure S2** Protein carbonylation and identification from the brain of the CK2a-Cre/shGCL<sup>SFL</sup> mouse. (A) Western blotting in MEFs obtained from the +/shGCL<sup>UFL</sup> mice shows efficient GCL protein knockdown when cells were transfected with a plasmid vector expressing a tamoxifen-dependent Cre recombinase (CreER<sup>TM</sup>), only in the presence of tamoxifen (TM). A representative western blot is shown. (B) Tamoxifen induced a reduction in total thiols after transfecting +/shGCL<sup>UFL</sup> MEFs with the plasmid vector expressing CreER<sup>TM</sup> recombinase, but not when cells were transfected with the empty vector (\*p<0.05; n=3; Student's *t* test) (C) Tamoxifen induced a reduction in total and reduced (GSH) glutathione, and an increase in oxidized glutathione (GSSG), after transfecting +/shGCL<sup>UFL</sup> MEFs with the plasmid vector expressing CreER<sup>TM</sup> recombinase, but not when cells were transfected with the empty vector (\*p<0.05; n=3; Student's *t* test). (D) Tamoxifen induced ROS, as assessed by H<sub>2</sub>O<sub>2</sub> measurement, in +/shGCL<sup>UFL</sup> MEFs transfected with the plasmid vector expressing CreER<sup>TM</sup> recombinase, but not when cells were transfected with the empty vector (\*p<0.05; n=3; Student's *t* test). (E)

Quantification of total protein carbonylation in different brain regions of the CK2a-Cre/+ and the adult CK2a-Cre/shGCL<sup>SFL</sup> male mice. Data are mean  $\pm$  SEM values. \* $p < 0.05$  versus CK2a-Cre/+ (n=3) (Student's *t* test). (F) 2D-PAGE selected areas of the 13 proteins found to be most carbonylated, indicating the spots by arrows. These spots were purified and subjected to mass spectrometry identification. The accession number corresponds to Swissprot database. Proteins with score  $> 50$  were considered statistically significant according to the Probability based Mowse Score. Coverage represents the percentage of the protein sequence that was covered by the identified peptides. The oxidation fold is the mean values of fold increase in carbonyl levels in the CK2a-Cre/shGCL<sup>SFL</sup> versus CK2a-Cre/+ mice (n=3 mice per group; 3 independent biological samples run in independent gels). Cb, cerebellum; Str, striatum, Hip, hippocampus; PCx, pre-frontal cortex. VATA and VATB, V-type proton ATPase A and B subunits, respectively; DPYL2, dihydropyrimidinase-related protein 2; ENOG, neuron-specific enolase- $\gamma$ ; ENOA, enolase- $\alpha$ ; GAPDH, glyceraldehyde-3-phosphate dehydrogenase; PGAM1, phosphoglycerate mutase-2; pyruvate dehydrogenase E1 subunit, PDHE1; MDH1, malate dehydrogenase-1; KCRB, creatine kinase B; EF1A1, elongation factor 1 $\alpha$ .

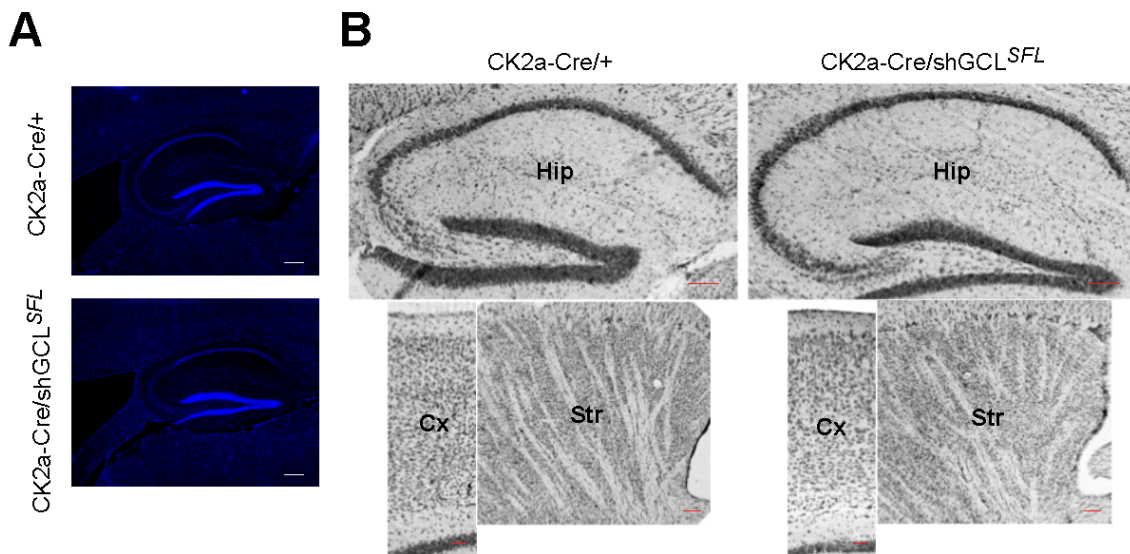

**Supplementary Figure S3** Morphological analysis of the CK2a-Cre/shGCL<sup>SFL</sup> adult male brain. (A) Nuclear staining of the hippocampus shows no gross morphological differences in the hippocampus structure between the CK2a-Cre/shGCL<sup>SFL</sup> and CK2a-Cre/+ male mice (scale bars, 200  $\mu$ m). (B) No major structural changes were observed in the width of the DG, CA1 and CA3 regions of the hippocampus (Hip; scale bars, 50  $\mu$ m), length of the cortex layers (Cx; Hip; scale bars, 50  $\mu$ m), or cell density in the striatum (Str; Hip; scale bars, 100  $\mu$ m) in the CK2a-Cre/shGCL<sup>SFL</sup> when compared with the CK2a-Cre/+ male mice.

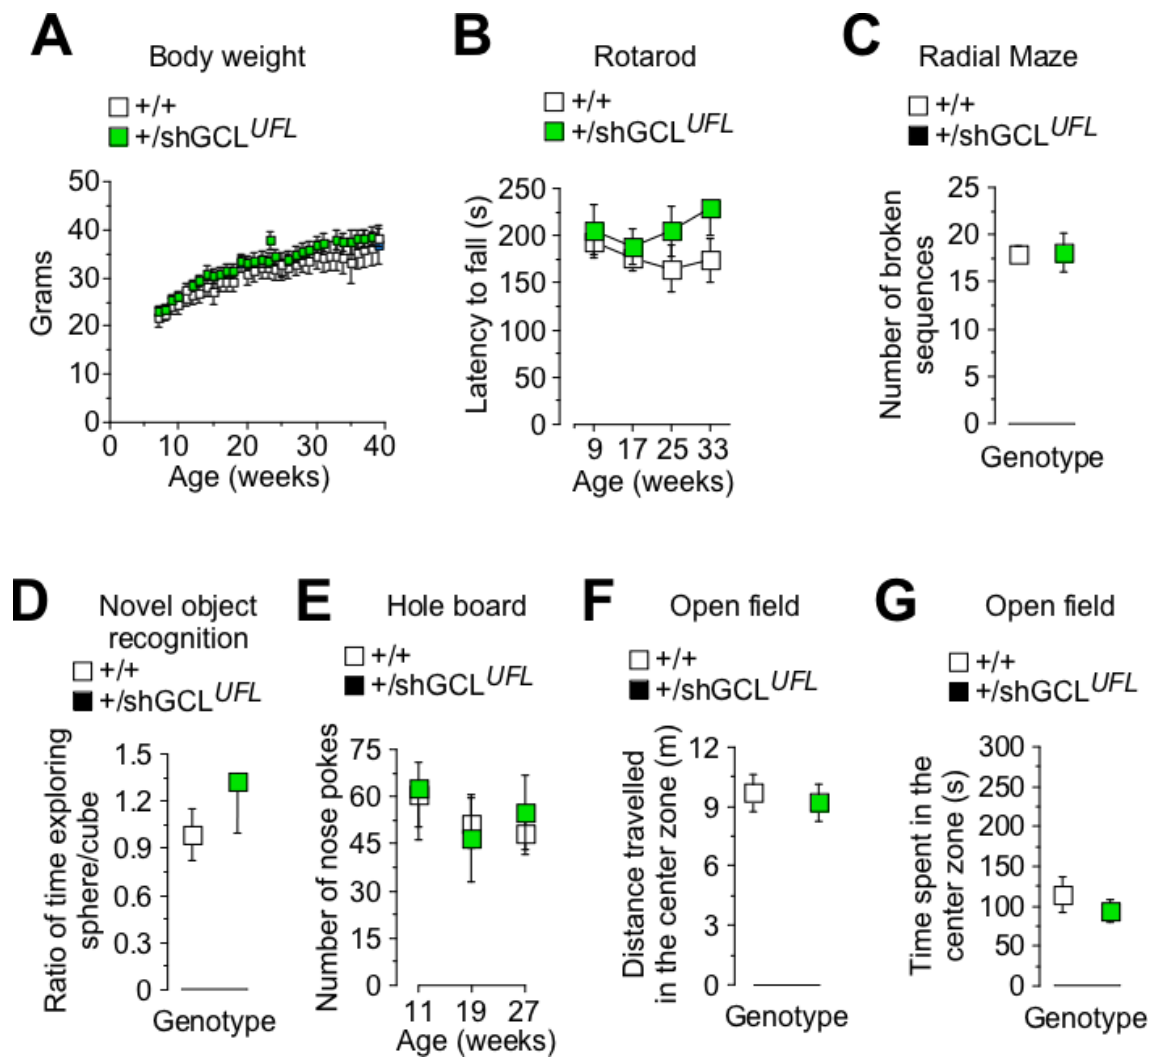

**Supplementary Figure S4** No behavioral alterations in the shGCL<sup>UFL/+</sup> mice. **(A)** Unaltered body weight in the shGCL<sup>UFL/+</sup> male mice when compared with the wild type (+/+) male mice. **(B)** Unaltered performance of the shGCL<sup>UFL/+</sup> mice at the rotarod test. **(C)** Unaltered number of broken sequences of the shGCL<sup>UFL/+</sup> mice at the radial arm maze test. **(D)** Unaltered performance of the shGCL<sup>UFL/+</sup> mice at the novel object recognition test. **(E)** Unaltered number of nose pokes of the shGCL<sup>UFL/+</sup> mice at the Hole board test. **(F, G)** Unaltered distance travelled and time spent in the central zone of the shGCL<sup>UFL/+</sup> mice at the Open field test. Data are mean  $\pm$  SEM values (n=6) (Student's *t* test).
